# Supplementary material for: Immune response and innervation signatures in aseptic hip implant loosening
Source: PubMed Central journal article supplement (PMC4937545; doi:10.1186/s12967-016-0950-5), 2016-07-07

0

1

2

3

Synovial thickening

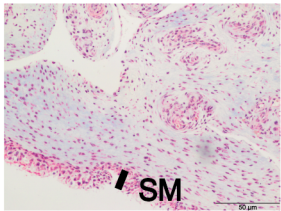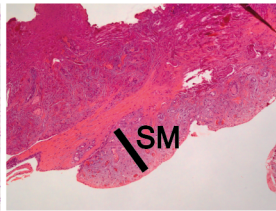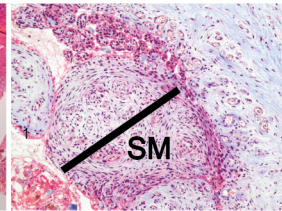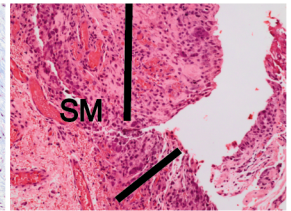

Synovial villi

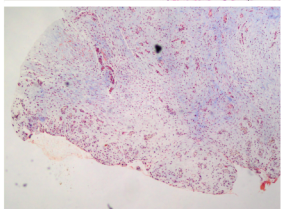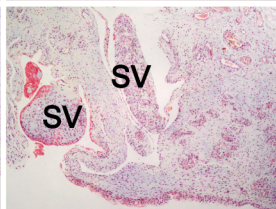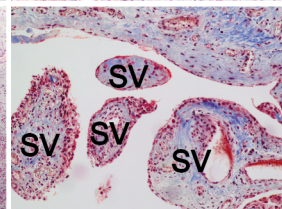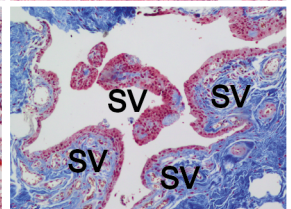

Fibrosis

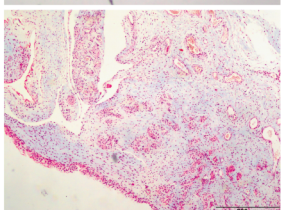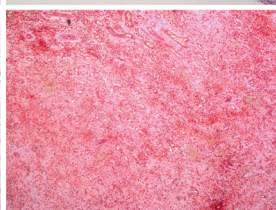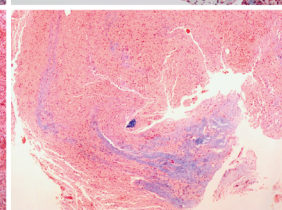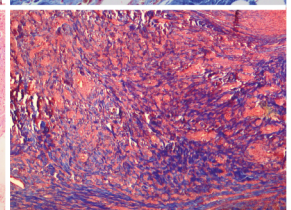

Necrosis

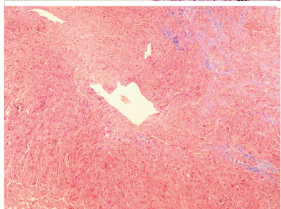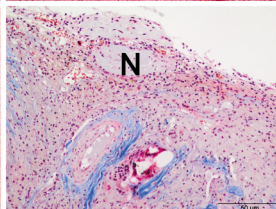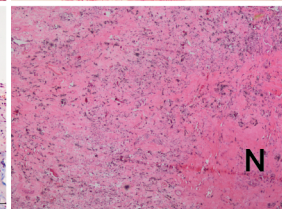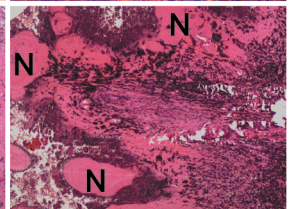

TGF-β1

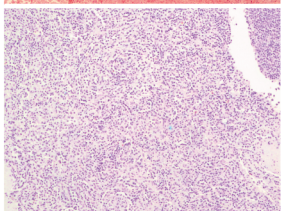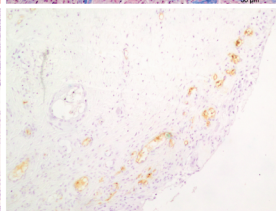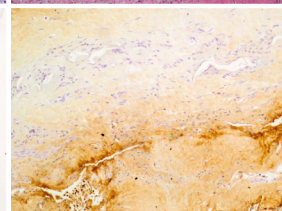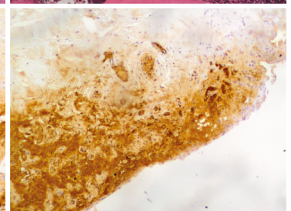

Supplement: 12967_2016_950_MOESM1_ESM.pdf [file 12967_2016_950_MOESM1_ESM.pdf]
