# Supplementary material for: Immune response and innervation signatures in aseptic hip implant loosening
Source: PubMed Central journal article supplement (PMC4937545; doi:10.1186/s12967-016-0950-5), 2016-07-07

1

2

3

Polymeric particles

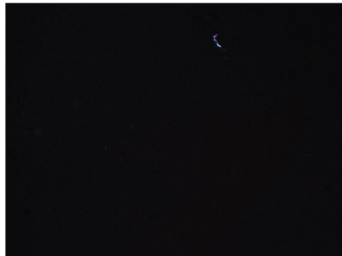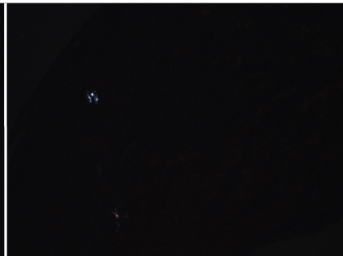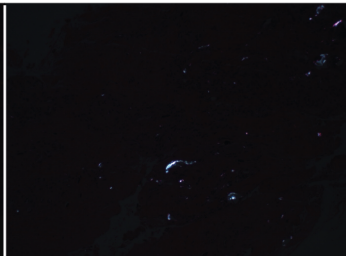

Metallic particles

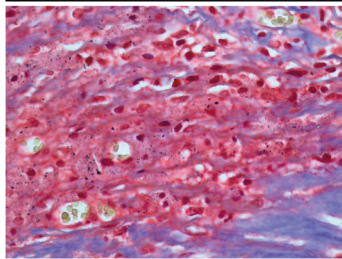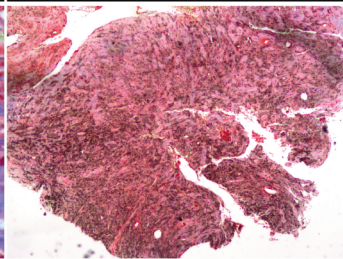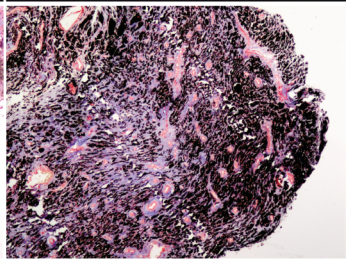

ZrO<sub>2</sub>  
(Ph3 filter)

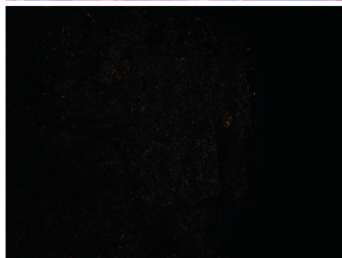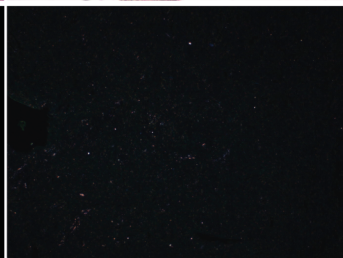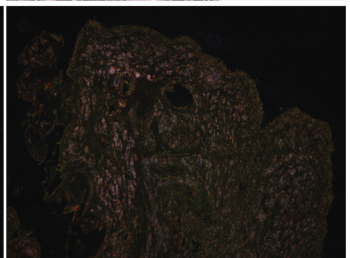

Supplement: 12967_2016_950_MOESM2_ESM.pdf [file 12967_2016_950_MOESM2_ESM.pdf]
