# Supplementary material for: Immune response and innervation signatures in aseptic hip implant loosening
Source: Springer Nature journal article supplement (doi:10.1186/s12967-016-0950-5), 2016-07-07

1

2

3

Polymorphonucleated  
cells (PMN)

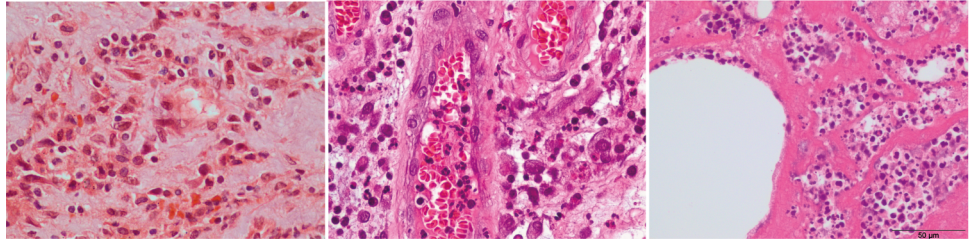

Macrophages  
(CD68+ cells)

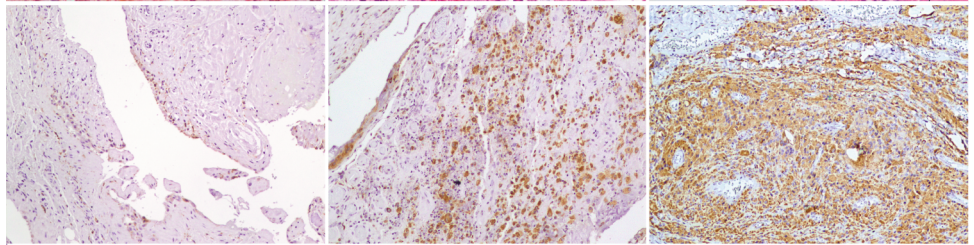

Multinucleated  
giant cells

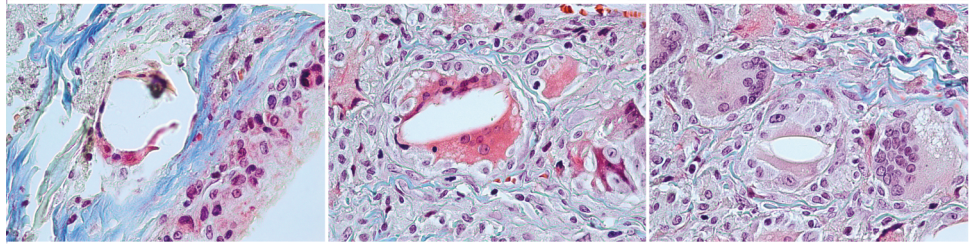

B cells  
(CD20+ cells)

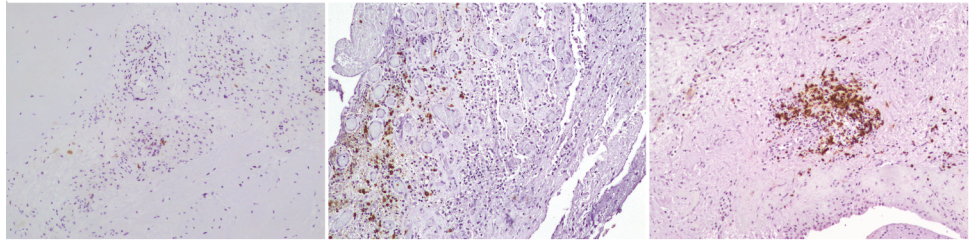

T cells  
(CD3+ cells)

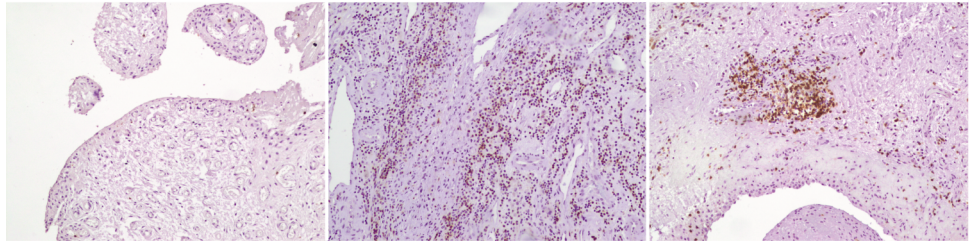

Supplement: MOESM3 [file 10351970]
